# Supplementary material for: Management of Chronic Graft-vs.-Host Disease in Children and Adolescents With ALL: Present Status and Model for a Personalised Management Plan
Source: Frontiers journal article supplement (doi:10.3389/fped.2022.808103), 2022-02-18

# **Pediatric adaption of NIH 2014 cGVHD diagnosis/staging for clinical practice** **German-Austrian-Swiss GVHD Consortium**

completed by:

date

patient name

▶ please score/check the worst manifestation

▶ diagnostic features are marked **bold**

**classification:**

☐ feat. of acute GVHD
 ☐ feat.of classic cGVHD
 ☐ both

**onset type at diagnosis:**

☐ de novo
 ☐ quiescent
 ☐ progressive

height: \_\_\_\_\_

weight: \_\_\_\_\_

| symptoms/features | Score 0                                                               | Score1                                                                                                         | Score 2                                                                                                      | Score 3                                                                                        |
|-------------------|-----------------------------------------------------------------------|----------------------------------------------------------------------------------------------------------------|--------------------------------------------------------------------------------------------------------------|------------------------------------------------------------------------------------------------|
| KPS/LPS: %        | <input type="checkbox"/> asymptomatic and fully active (KPS/LPS 100%) | <input type="checkbox"/> sympt., fully amb., restricted only in physically strenuous activity (KPS/LPS 80-90%) | <input type="checkbox"/> sympt.,amb., capable of self-care, >50% of waking hours out of bed (KPS/LPS 60-70%) | <input type="checkbox"/> sympt., limited self-care >50% of waking hours in bed (KPS/LPS < 60%) |

| SKIN                                                        |                          |                          |                          |                          |
|-------------------------------------------------------------|--------------------------|--------------------------|--------------------------|--------------------------|
| Feat. scored by BSA:                                        | no BSA involved          | 1-18% BSA                | 19-50% BSA               | > 50% BSA                |
| <input type="checkbox"/> maculopapular rash/erythema        | <input type="checkbox"/> | <input type="checkbox"/> | <input type="checkbox"/> | <input type="checkbox"/> |
| <input type="checkbox"/> <b>lichen planus-like features</b> | <input type="checkbox"/> | <input type="checkbox"/> | <input type="checkbox"/> | <input type="checkbox"/> |
| <input type="checkbox"/> <b>sclerotic features:</b>         | <input type="checkbox"/> | <input type="checkbox"/> | <input type="checkbox"/> | <input type="checkbox"/> |
| <input type="checkbox"/> <b>lichen sclerosus-like</b>       | <input type="checkbox"/> | <input type="checkbox"/> | <input type="checkbox"/> | <input type="checkbox"/> |
| <input type="checkbox"/> papulosquamous lesions             | <input type="checkbox"/> | <input type="checkbox"/> | <input type="checkbox"/> | <input type="checkbox"/> |
| <input type="checkbox"/> ichthyosis                         | <input type="checkbox"/> | <input type="checkbox"/> | <input type="checkbox"/> | <input type="checkbox"/> |
| <input type="checkbox"/> keratosis pilaris-like GVHD        | <input type="checkbox"/> | <input type="checkbox"/> | <input type="checkbox"/> | <input type="checkbox"/> |

Feat. not scored by BSA:

☐ hyperpigmentation
 ☐ hypopigmentation/ depigmentation
 ☐ **poikiloderma**
☐ severe pruritus
 ☐ hair involvement
 ☐ nail involvement
 ☐ sweat impairment
 ☐ abnormality present but explained entirely by non-GVHD cause (specify):

%BSA:

child:

adult:

palm: 1,5

|                     |                                                |                                                                                         |                                                                                                                                                               |
|---------------------|------------------------------------------------|-----------------------------------------------------------------------------------------|---------------------------------------------------------------------------------------------------------------------------------------------------------------|
| sclerotic features: | <input type="checkbox"/> no sclerotic features | <input type="checkbox"/> superficial sclerotic features "not hidebound" (able to pinch) | <input type="checkbox"/> deep sclerotic features "hidebound" (unable to pinch) <input type="checkbox"/> impaired mobility <input type="checkbox"/> ulceration |
|---------------------|------------------------------------------------|-----------------------------------------------------------------------------------------|---------------------------------------------------------------------------------------------------------------------------------------------------------------|

| MOUTH                                                                                              |                                      |                                                                                                   |                                                                                                    |                                                                                                               |
|----------------------------------------------------------------------------------------------------|--------------------------------------|---------------------------------------------------------------------------------------------------|----------------------------------------------------------------------------------------------------|---------------------------------------------------------------------------------------------------------------|
| <input type="checkbox"/> erythema                                                                  | <input type="checkbox"/> no symptoms | <input type="checkbox"/> mild sympt with disease signs but not limiting oral intake significantly | <input type="checkbox"/> moderate sympt. with disease signs with partial limitation of oral intake | <input type="checkbox"/> severe sympt. with disease signs on examination with major limitation of oral intake |
| <input type="checkbox"/> <b>lichen planus-like features</b>                                        |                                      |                                                                                                   |                                                                                                    |                                                                                                               |
| <input type="checkbox"/> hyperkeratot. plaques                                                     |                                      |                                                                                                   |                                                                                                    |                                                                                                               |
| <input type="checkbox"/> mucocoeles <input type="checkbox"/> pseudomembranes                       |                                      |                                                                                                   |                                                                                                    |                                                                                                               |
| <input type="checkbox"/> ulcers <input type="checkbox"/> mucosal atrophy                           |                                      |                                                                                                   |                                                                                                    |                                                                                                               |
| <input type="checkbox"/> dryness <input type="checkbox"/> pain                                     |                                      |                                                                                                   |                                                                                                    |                                                                                                               |
| <input type="checkbox"/> abnormality present but explained entirely by non-GVHD cause (specify):   |                                      |                                                                                                   |                                                                                                    |                                                                                                               |
| <input type="checkbox"/> abnormality thought to represent GVHD <b>PLUS</b> other causes (specify): |                                      |                                                                                                   |                                                                                                    |                                                                                                               |

| symptoms/features                                                                                                                                                                                                                                                                                                                                                                    | Score 0                                                                     | Score 1                                                                                                                                          | Score 2                                                                                                                                                                         | Score 3                                                                                                                                                                                                                                            |
|--------------------------------------------------------------------------------------------------------------------------------------------------------------------------------------------------------------------------------------------------------------------------------------------------------------------------------------------------------------------------------------|-----------------------------------------------------------------------------|--------------------------------------------------------------------------------------------------------------------------------------------------|---------------------------------------------------------------------------------------------------------------------------------------------------------------------------------|----------------------------------------------------------------------------------------------------------------------------------------------------------------------------------------------------------------------------------------------------|
| <b>EYES</b>                                                                                                                                                                                                                                                                                                                                                                          |                                                                             |                                                                                                                                                  |                                                                                                                                                                                 |                                                                                                                                                                                                                                                    |
| <input type="checkbox"/> keratokonjunktivitis sicca (KCS)<br><input type="checkbox"/> confirmed by ophthalmologist<br><input type="checkbox"/> dryness <input type="checkbox"/> pain<br><input type="checkbox"/> photophobia <input type="checkbox"/> blepharitis<br><input type="checkbox"/> pseudomembranes <input type="checkbox"/> ulcers                                        | <input type="checkbox"/> no symptoms                                        | <input type="checkbox"/> mild dry eye sympt.<br>not affecting ADL<br>(requirement of<br>lubricant eye drops<br>≤ 3 x per day)                    | <input type="checkbox"/> moderate dry eye sympt.<br>partially affecting ADL<br>(lubricant eye drops<br>>3 x/d or punctual plugs)<br>without new vision<br>impairment due to KCS | <input type="checkbox"/> severe dry eye sympt.<br>significantly affecting ADL<br>(special eyewear to relieve pain) or<br>unable to work because of ocular<br>sympt or loss of vision due to KCS                                                    |
| <input type="checkbox"/> abnormality present but explained entirely by non-GVHD cause (specify):<br><input type="checkbox"/> abnormality thought to represent GVHD <b>PLUS</b> other causes (specify):                                                                                                                                                                               |                                                                             |                                                                                                                                                  |                                                                                                                                                                                 |                                                                                                                                                                                                                                                    |
| <b>GI TRACT</b>                                                                                                                                                                                                                                                                                                                                                                      |                                                                             |                                                                                                                                                  |                                                                                                                                                                                 |                                                                                                                                                                                                                                                    |
| <input type="checkbox"/> esophageal web/<br>prox stricture or ring<br><input type="checkbox"/> dysphagia <input type="checkbox"/> abdominal pain<br><input type="checkbox"/> anorexia <input type="checkbox"/> failure to thrive<br><input type="checkbox"/> nausea <input type="checkbox"/> vomiting<br><input type="checkbox"/> diarrhea <input type="checkbox"/> weight loss ≥ 5% | <input type="checkbox"/> no symptoms                                        | <input type="checkbox"/> symptoms without<br>significant weight<br>loss (5%)                                                                     | <input type="checkbox"/> sympt. associated with<br>mild to moderate<br>weight loss (5-15%)<br>or moderate diarrhea<br>without significant<br>interference with<br>daily living  | <input type="checkbox"/> symptoms associated with<br>significant weight loss (> 15%)<br>requires nutritional supplement for<br>most calorie needs or<br>esophageal dilatation or<br>severe diarrhea with<br>signif. Interference with daily living |
| <input type="checkbox"/> abnormality present but explained entirely by non-GVHD cause (specify):<br><input type="checkbox"/> abnormality thought to represent GVHD <b>PLUS</b> other causes (specify):                                                                                                                                                                               |                                                                             |                                                                                                                                                  |                                                                                                                                                                                 |                                                                                                                                                                                                                                                    |
| <b>LIVER</b>                                                                                                                                                                                                                                                                                                                                                                         |                                                                             |                                                                                                                                                  |                                                                                                                                                                                 |                                                                                                                                                                                                                                                    |
| <input type="checkbox"/> hepatic pattern                                                                                                                                                                                                                                                                                                                                             | <input type="checkbox"/> normal total bili<br>and ALT or AP<br>< 3 ULN      | normal total bili<br><input type="checkbox"/> with ALT ≥ 3-5x ULN<br><input type="checkbox"/> or AP ≥ 3 x ULN                                    | <input type="checkbox"/> elevated total bili<br>but ≤ 3 mg/dl or<br>ALT > 5 ULN                                                                                                 | <input type="checkbox"/> elevated total bili > 3 mg/dl                                                                                                                                                                                             |
| <input type="checkbox"/> abnormality present but explained entirely by non-GVHD cause (specify):<br><input type="checkbox"/> abnormality thought to represent GVHD <b>PLUS</b> other causes (specify):                                                                                                                                                                               |                                                                             |                                                                                                                                                  |                                                                                                                                                                                 |                                                                                                                                                                                                                                                    |
| <b>LUNGS</b>                                                                                                                                                                                                                                                                                                                                                                         |                                                                             |                                                                                                                                                  |                                                                                                                                                                                 |                                                                                                                                                                                                                                                    |
| <b>FEV1:</b> _____% <b>MEF25:</b> _____%<br><b>FVC:</b> _____% <b>MEF50:</b> _____%<br><b>DLCO:</b> _____% <b>MEF75:</b> _____%<br><b>RV:</b> _____ <input type="checkbox"/> RV/TLC > 120%<br><b>CT:</b> _____                                                                                                                                                                       | <input type="checkbox"/> no symptoms<br><input type="checkbox"/> FEV1 ≥ 80% | <input type="checkbox"/> mild symptoms<br>(shortness of breath<br>after climbing one<br>flight of steps)<br><input type="checkbox"/> FEV1 60-79% | <input type="checkbox"/> moderate symptoms<br>(shortness of breath<br>after walking on<br>flat ground)<br><input type="checkbox"/> FEV1 40-59%                                  | <input type="checkbox"/> severe symptoms<br>(shortness of breath at rest;<br>requiring O2)<br><input type="checkbox"/> FEV1 ≤ 39%                                                                                                                  |
| <input type="checkbox"/> pulmonary function test not performed<br><input type="checkbox"/> abnormality present but explained entirely by non-GVHD cause (specify):<br><input type="checkbox"/> abnormality thought to represent GVHD <b>PLUS</b> other causes (specify):                                                                                                             |                                                                             |                                                                                                                                                  |                                                                                                                                                                                 |                                                                                                                                                                                                                                                    |
| <b>JOINTS AND FASCIA</b>                                                                                                                                                                                                                                                                                                                                                             |                                                                             |                                                                                                                                                  |                                                                                                                                                                                 |                                                                                                                                                                                                                                                    |
| <input type="checkbox"/> ped P-ROM score (see below)<br><input type="checkbox"/> edema <input type="checkbox"/> fasciitis<br><input type="checkbox"/> muscle cramps <input type="checkbox"/> athralgia                                                                                                                                                                               | <input type="checkbox"/> no symptoms                                        | <input type="checkbox"/> mild tightness,<br>normal or mild ↓ of<br>range of motion (ROM)<br>not affecting ADL                                    | <input type="checkbox"/> tightness or joint<br>contractures, fasciitis,<br>moderate ↓ of ROM,<br>mild - moderate ↓ of ADL                                                       | <input type="checkbox"/> contractures, fasciitis<br>significant ↓ of ROM,<br>significant ↓ of ADL                                                                                                                                                  |
| <input type="checkbox"/> abnormality present but explained entirely by non-GVHD cause (specify):<br><input type="checkbox"/> abnormality thought to represent GVHD <b>PLUS</b> other causes (specify):                                                                                                                                                                               |                                                                             |                                                                                                                                                  |                                                                                                                                                                                 |                                                                                                                                                                                                                                                    |
| <b>GENITAL TRACT</b>                                                                                                                                                                                                                                                                                                                                                                 |                                                                             |                                                                                                                                                  |                                                                                                                                                                                 |                                                                                                                                                                                                                                                    |
| <input type="checkbox"/> erosions, fissures<br><input type="checkbox"/> lichen planus-like features<br><input type="checkbox"/> lichen sclerosus-like features<br><input type="checkbox"/> labial/ vaginal scarring <input type="checkbox"/> phimosis                                                                                                                                | <input type="checkbox"/> no signs                                           | <input type="checkbox"/> mild signs                                                                                                              | <input type="checkbox"/> moderate signs                                                                                                                                         | <input type="checkbox"/> severe signs with or without<br>symptoms                                                                                                                                                                                  |
| <input type="checkbox"/> currently sexually active      coitarche: _____ years                                                                                                                                                                                                                                                                                                       |                                                                             |                                                                                                                                                  |                                                                                                                                                                                 |                                                                                                                                                                                                                                                    |
| <input type="checkbox"/> hormonal status: hypogonadism <input type="checkbox"/> signs of vaginal hypoestrogenization                                                                                                                                                                                                                                                                 |                                                                             |                                                                                                                                                  |                                                                                                                                                                                 |                                                                                                                                                                                                                                                    |
| <input type="checkbox"/> abnormality present but explained entirely by non-GVHD cause (specify):<br><input type="checkbox"/> abnormality thought to represent GVHD <b>PLUS</b> other causes (specify):                                                                                                                                                                               |                                                                             |                                                                                                                                                  |                                                                                                                                                                                 |                                                                                                                                                                                                                                                    |

### Overall GVHD severity

|                                    |                                                                                      |                                |
|------------------------------------|--------------------------------------------------------------------------------------|--------------------------------|
| <input type="checkbox"/> no cGVHD  |                                                                                      | maximum individual score       |
| <input type="checkbox"/> mild:     | max. score of 1 in any affected organ, max. 2 organs affected, no lung involvement   | total score (sum)              |
| <input type="checkbox"/> moderate: | ≥3 organ with max score 1 or max. score of 2 in any affected organ, lung score max 1 | average score (total score/24) |
| <input type="checkbox"/> severe:   | score 3 in any affected organ, lung score 2-3                                        | number of affected organs      |

### Other indicators, clinical features or complications related to cGVHD

| check all that apply and assign a severity score (0-3) based on functional impact |                                                              |                                                 | biopsy:                                                                  | Yes <input type="checkbox"/> No <input type="checkbox"/> |
|-----------------------------------------------------------------------------------|--------------------------------------------------------------|-------------------------------------------------|--------------------------------------------------------------------------|----------------------------------------------------------|
| <input type="checkbox"/> ascites (serositis)                                      | <input type="checkbox"/> myasthenia gravis                   | <input type="checkbox"/> diabetes               | date:                                                                    |                                                          |
| <input type="checkbox"/> pericardial effusion                                     | <input type="checkbox"/> peripheral nervous manifestations   | <input type="checkbox"/> eosinophilia >500 /ul  | organ:                                                                   |                                                          |
| <input type="checkbox"/> pleural effusion                                         | <input type="checkbox"/> central nervous manifestations      | <input type="checkbox"/> platelets <100 000/ul  | GVHD confirmed? Yes <input type="checkbox"/> No <input type="checkbox"/> |                                                          |
| <input type="checkbox"/> nephrotic syndrome                                       | <input type="checkbox"/> polymyositis                        | <input type="checkbox"/> hypo/hyperglobulinemia |                                                                          | suspicion                                                |
| <input type="checkbox"/> others (specify)                                         | <input type="checkbox"/> weight loss >5% without GI symptoms | <input type="checkbox"/> auto-antibodies        |                                                                          |                                                          |
|                                                                                   |                                                              | <input type="checkbox"/> immune thyroiditis     |                                                                          |                                                          |

### Change from prior evaluation:

☐ improved ☐ stable ☐ worse ☐ comment: \_\_\_\_\_

### Intensity of current immunosuppression

- ☐ None  
☐ Mild (single agent prednisone <0.5 mg/kg/day)  
☐ Moderate (prednisone ≥0.5 mg/kg/day and/or any single agent/modality)  
☐ High (2 or more agents/modalities ± prednisone ≥0.5 mg/kg/day)

### Therapeutic intent at the time of clinic visit

- ☐ Decision to decrease systemic therapy because cGVHD is better  
☐ Decision is to not change current systemic therapy because cGVHD is stable  
☐ Decision is to increase systemic therapy because cGVHD is worse  
☐ Alter systemic therapy due to its toxicity  
☐ Substitute systemic therapy due to lack of response  
☐ Withdraw systemic therapy due to lack of response  
☐ Not applicable

### Clinician's impression of activity

- ☐ Inactive, off systemic therapy or topical immunosuppression  
☐ Inactive, on systemic therapy or topical immunosuppression  
☐ Active, irrespective of the level of current therapy  
☐ Highly active, irrespective of the level of current therapy

## Pediatric Photographic Range of Motion (adapted ped P-ROM)

please mark appropriate number

shoulder: 1 (worst) 2 3 4 5 (normal)

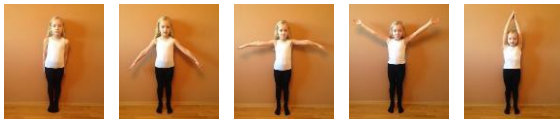

elbow: 1 (worst) 2 3 4 (normal)

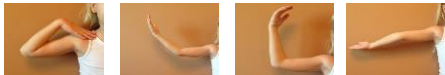

wrist / finger: 1 (worst) 2 3 4 (normal)

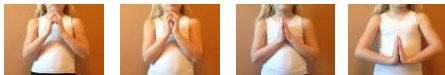

global flexion: 1 (worst) 2 3 4 (normal)

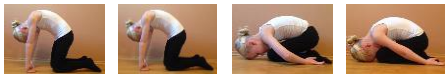

ankle: 1 (worst) 2 3 (normal)

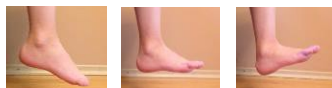

Supplement: Data_Sheet_1.PDF [file Data_Sheet_1.PDF]
